# Supplementary material for: TAM family receptors in conjunction with MAPK signalling are involved in acquired resistance to PI3Kα inhibition in head and neck squamous cell carcinoma
Source: PubMed Central journal article supplement (PMC7559997; doi:10.1186/s13046-020-01713-9), 2020-10-15
Supplement: 13046_2020_1713_MOESM1_ESM.pdf [file 13046_2020_1713_MOESM1_ESM.pdf]

**Additional Table 1.** Sources and cell culture media for established HNSCC cell lines used in this study.

| Cell Line   | HPV Status | Tumour Site (if available) | Patient Information (if available) | Growth Medium        | Source                   |
|-------------|------------|----------------------------|------------------------------------|----------------------|--------------------------|
| 93-VU-147T  | Positive   | Floor of mouth             | Male, T4N2                         | DMEM/F12             | VUMC                     |
| Ca133       | Negative   | Tongue                     | Male                               | DMEM + HI FBS + NEAA | DSMZ                     |
| SCC15       | Negative   | Tongue                     | Male                               | DMEM/F12             | ATCC                     |
| PCI6A       | Negative   | —                          | —                                  | DMEM/F12             | University of Pittsburgh |
| SCC61       | Negative   | —                          | —                                  | DMEM/F12             | Yale                     |
| RF37A       | Negative   | —                          | —                                  | DMEM/F12             | University of Pittsburgh |
| HSC2        | Negative   | Oral cavity                | Male                               | EMEM                 |                          |
| UMSCC47     | Positive   | Lateral tongue             | Male, T3N1M0                       | DMEM/F12             | University of Michigan   |
| UPCI:SCC154 | Positive   | Oral cavity                | Male, T4N2                         | DMEM/F12             | University of Pittsburgh |
| JHU029      | Negative   | Oropharynx                 | Male, T4N0                         | DMEM/F12             | Johns Hopkins            |
| RF15B       | Negative   | —                          | —                                  | DMEM/F12             | University of Pittsburgh |
| HMS001      | Positive   | Oropharynx (tonsil)        | Male                               | DMEM/F12             | Harvard Medical School   |
| PCI6B       | Negative   | Oropharynx                 | Male, T3N3M0                       | DMEM/F12             | University of Pittsburgh |
| D562        | Negative   | Pharynx                    | Female                             | DMEM/F12             | ATCC                     |
| SCC25       | Negative   | Hypopharynx                | Male                               | DMEM/F12             | ATCC                     |
| UPCI:SCC090 | Positive   | Oropharynx (tongue base)   | Male, T2N0                         | DMEM/F12             | University of Pittsburgh |
| PCI13       | Negative   | Oral cavity                | Male, T4N1M0                       | DMEM/F12             | University of Pittsburgh |
| RF22A       | Negative   | —                          | —                                  | DMEM/F12             | University of Pittsburgh |
| JHU006      | Negative   | —                          | —                                  | DMEM/F12             | Johns Hopkins            |
| Ca127       | Negative   | Tongue                     | Male                               | DMEM/F12             | ATCC                     |
| SCC9        | Negative   | Tongue                     | Male                               | DMEM/F12             | ATCC                     |
| JHU011      | Negative   | Larynx                     | Male, T3N0                         | DMEM/F12             | Johns Hopkins            |
| SCC4        | Negative   | Tongue                     | Male                               | DMEM/F12             | ATCC                     |
| SCC2        | Positive   | —                          | —                                  | DMEM/F12             |                          |
| FaDu        | Negative   | Hypopharynx                | Male                               | DMEM/F12             | ATCC                     |

DMEM, Dulbecco's Modified Eagle Medium; EMEM, Eagle's Minimum Essential Medium; NEAA, non essential amino acids; VUMC, VU University Medical Center Amsterdam; DSMZ, Deutsche Sammlung von Mikroorganismen und Zellkulturen; ATCC, American Type Culture Collection

**Additional Table 2.** Short-tandem repeat (STR) profiling results confirming matching identities of primary tumor, blood, xenograft tumors and cell lines, where available.

| Sample          | Amelogenin | CSF1PO | D13S317 | D16S539 | D18S51 | D19S433 | D21S11  | D2S1338 | D3S1358 | D5S818 | D7S820 | D8S1179 | FGA   | TH01  | TPOX  | vWA   |
|-----------------|------------|--------|---------|---------|--------|---------|---------|---------|---------|--------|--------|---------|-------|-------|-------|-------|
| PDX-C Blood     | X,Y        | 10,12  | 11,13   | 11,12   |        |         | 28,32,2 |         |         | 11,11  | 10,10  |         |       | 6,9,3 | 8,11  | 16,16 |
| PDX-C Primary   | X,Y        | 10,12  | 11,13   | 11,12   |        |         | 28,32,2 |         |         | 11,11  | 10,10  |         |       | 6,9,3 | 8,11  | 16,16 |
| PDX-C C4        | X,Y        | 10,12  | 11,13   | 11,12   | 11,13  | 14,14   | 28,28   | 17,18   | 15,15   | 11,11  | 10,10  | 13,13   | 25,25 | 6,9,3 | 8,11  | 16,17 |
| PDX-C C5        | X,Y        | 10,12  | 11,13   | 11,12   |        |         | 28,32,2 |         |         | 11,11  | 10,10  |         |       | 6,9,3 | 8,11  | 16,17 |
| PDX-C B2        | X,Y        | 10,12  | 11,13   | 11,12   |        |         | 28,28   |         |         | 11,11  | 10,10  |         |       | 6,9,3 | 8,11  | 16,17 |
| PDX-C B3        | X,Y        | 10,12  | 11,13   | 11,12   | 11,13  | 14,14   | 28,28   | 17,18   | 15,15   | 11,11  | 10,10  | 13,13   | 25,25 | 6,9,3 | 8,11  | 16,17 |
| PDX-C B4        | X,Y        | 10,12  | 11,13   | 11,12   | 11,13  | 14,14   | 28,32,2 | 17,18   | 15,15   | 11,11  | 10,10  | 13,13   | 25,25 | 6,9,3 | 8,11  | 16,17 |
| PDX-C Cell Line | X,Y        | 12,12  | 11,13   | 11,12   | 11,13  | 14,14   | 28,32,2 | 17,18   | 15,15   | 11,11  | 10,10  | 13,13   | 25,25 | 6,9,3 | 8,11  | 16,17 |
| PDX-E Primary   | X,X        | 12,12  | 12,12   | 9,9     |        |         | 30,30,2 |         |         | 12,13  | 11,11  |         |       | 7,9,3 | 8,11  | 17,17 |
| PDX-E C3        | X,X        | 12,12  | 12,12   | 9,9     | 10,18  | 12,16   | 30,30,2 | 19,19   | 17,17   | 12,13  | 11,11  | 13,13   | 22,23 | 7,9,3 | 11,11 | 17,17 |
| PDX-E C4        | X,X        | 12,12  | 12,12   | 9,9     |        |         | 30,30,2 |         |         | 12,13  | 11,11  |         |       | 7,9,3 | 11,11 | 17,17 |
| PDX-E B2        | X,X        | 12,12  | 12,12   | 9,9     | 10,18  | 12,16   | 30,30,2 | 19,19   | 17,17   | 12,13  | 11,11  | 13,13   | 22,23 | 7,9,3 | 8,11  | 17,17 |
| PDX-E B3        | X,X        | 12,12  | 12,12   | 9,9     |        |         | 30,30,2 |         |         | 12,13  | 11,11  |         |       | 7,9,3 | 8,11  | 17,17 |
| PDX-E B4        | X,X        | 12,12  | 12,12   | 9,9     | 10,18  | 12,16   | 30,30,2 | 19,19   | 17,17   | 12,13  | 11,11  | 13,13   | 22,23 | 7,9,3 | 8,11  | 17,17 |

**Additional Table 3.** Antibodies used in this study.

| Antibody            | Company                  | Catalogue Number | Dilution    |
|---------------------|--------------------------|------------------|-------------|
| pAkt (T308)         | CST                      | 4056             | 1:1000      |
| pAkt (S473)         | CST                      | 9271             | 1:1000      |
| Akt (pan)           | CST                      | 4685             | 1:1000      |
| pERK1/2 (T202/Y204) | CST                      | 4370             | 1:1000      |
| ERK1/2              | CST                      | 4696             | 1:1000      |
| pP90RSK (S380)      | CST                      | 11989            | 1:1000      |
| P90RSK (pan)        | CST                      | 9355             | 1:1000      |
| PARP                | BD Pharmingen            | 556494           | 2ug/mL      |
| Cleaved PARP        | CST                      | 5625             | 1:1000      |
| TYRO3               | CST                      | 5585             | 1:1000      |
| AXL                 | CST                      | 8661             | 1:1000      |
| MER-TK              | abcam                    | ab52968          | 1/2000      |
| GAB2                | CST                      | 3239             | 1:1000      |
| pMEK1 (S298)        | CST                      | 9128             | 1:1000      |
| MEK1                | CST                      | 2352             | 1:1000      |
| pS6 (S235/6)        | CST                      | 4858             | 1:1000*     |
| S6                  | CST                      | 2217             | 1:1000*     |
| EGFR                | CST                      | 4267             | 1:2000      |
| MER-TK <sup>+</sup> | abcam                    | ab52968          | 1/500       |
| TYRO3 <sup>+</sup>  | BETHYL Laboratories Inc. | IHC-00410        | 1:100-1:500 |
| $\alpha$ -tubulin   | CST                      | 2125             | 1:1000      |

CST, Cell Signaling Technology

\* primary antibody incubation: 1hr at room temperature

<sup>+</sup> for IHC

**Additional Table 4.** Clinical features of HNSCC patients used to generate PDX models of acquired drug resistance.

| PDX ID | Gender | Age | TNM Stage |     |    | Disease Site      | Subsite        | HPV Status | Smoking History | Alcohol Consumption | Recurrent |
|--------|--------|-----|-----------|-----|----|-------------------|----------------|------------|-----------------|---------------------|-----------|
|        |        |     | T         | N   | M  |                   |                |            |                 |                     |           |
| PDX-A  | M      | 72  | T2        | N2b | M0 | Lip & Oral Cavity | Tongue         | nt         | Ex-smoker       | Non-drinker         | No        |
| PDX-B  | M      | 60  | T3        | N2c | M0 | Oropharynx        | Base of Tongue | +          | Non-smoker      | Non-drinker         | Yes       |
| PDX-C  | M      | 44  | T2        | N1  | M0 | Lip & Oral Cavity | Tongue         | -          | Non-smoker      | Non-drinker         | No        |
| PDX-D  | F      | 87  | T2        | N2b | M0 | Lip & Oral Cavity | Tongue         | nt         | Non-smoker      | Non-drinker         | No        |
| PDX-E  | M      | 63  | T4        | N2b | M0 | Hypopharynx       | Piriform Sinus | -          | NA              | NA                  | NA        |

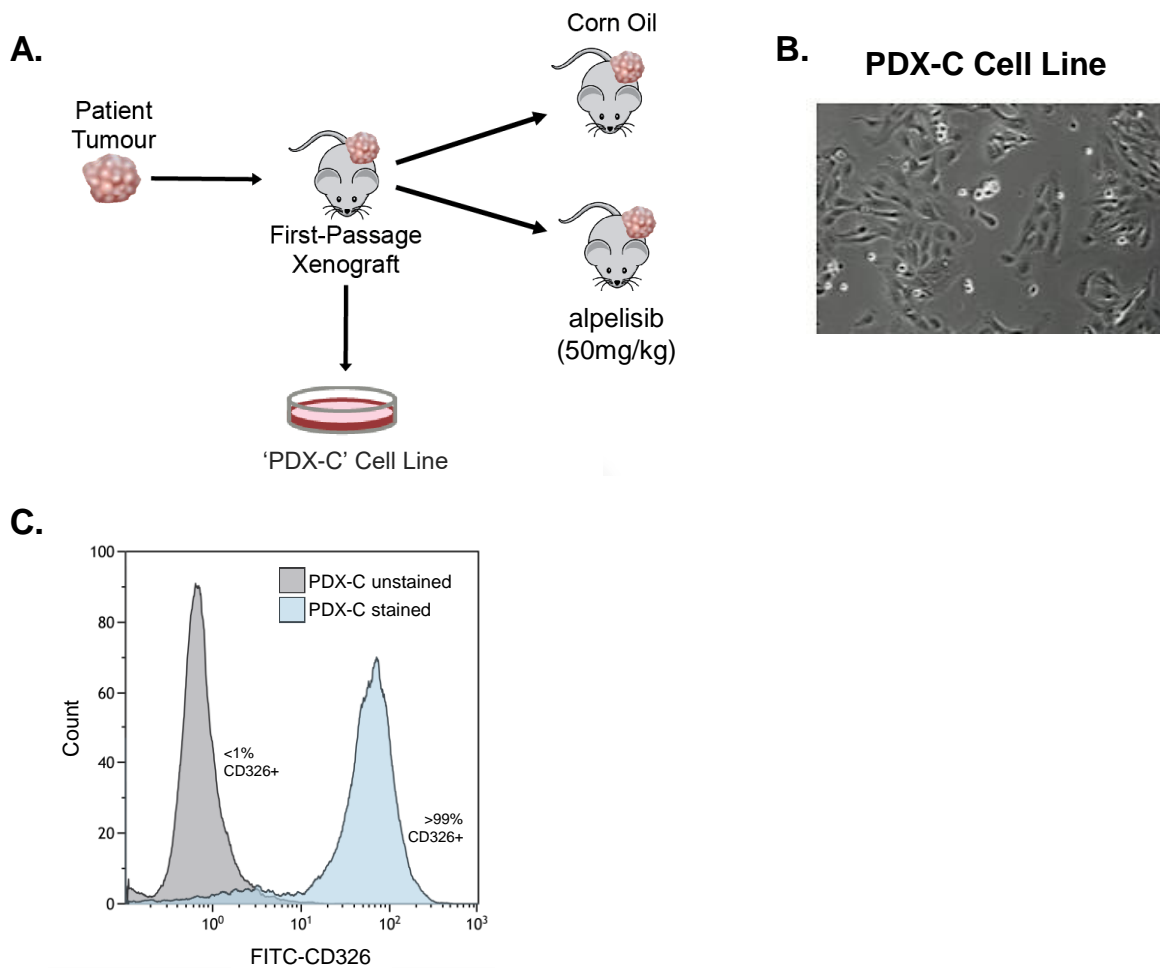

**Additional Fig. 1.** (A) Schematic outlining the derivation of cell line from PDX-C. (B) Phase contrast microscopy image of PDX-C cells. (C) Flow cytometry for cell surface expression of EpCAM (CD326) in PDX-C cells. Over 99% of PDX-C cells were found to be CD326-positive.

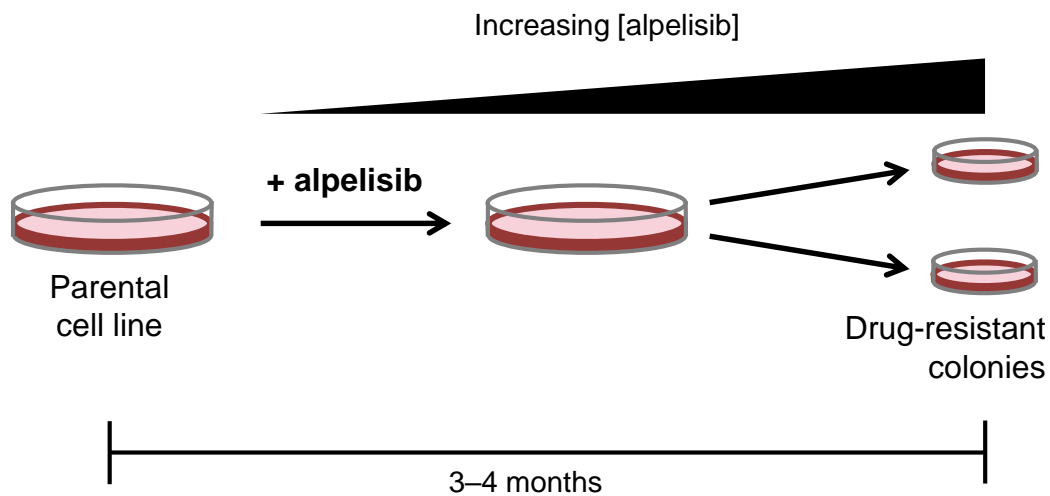

**Additional Fig. 2.** Schematic outlining the development of the alpelisib-resistant HNSCC cell lines. Parental cells (Cal33 and 93VU-147T) were treated with increasing doses of alpelisib, beginning with their  $IC_{50}$  values ( $0.5\mu\text{M}$  for Cal33,  $1.7\mu\text{M}$  for 93VU-147T), as previously established (20).

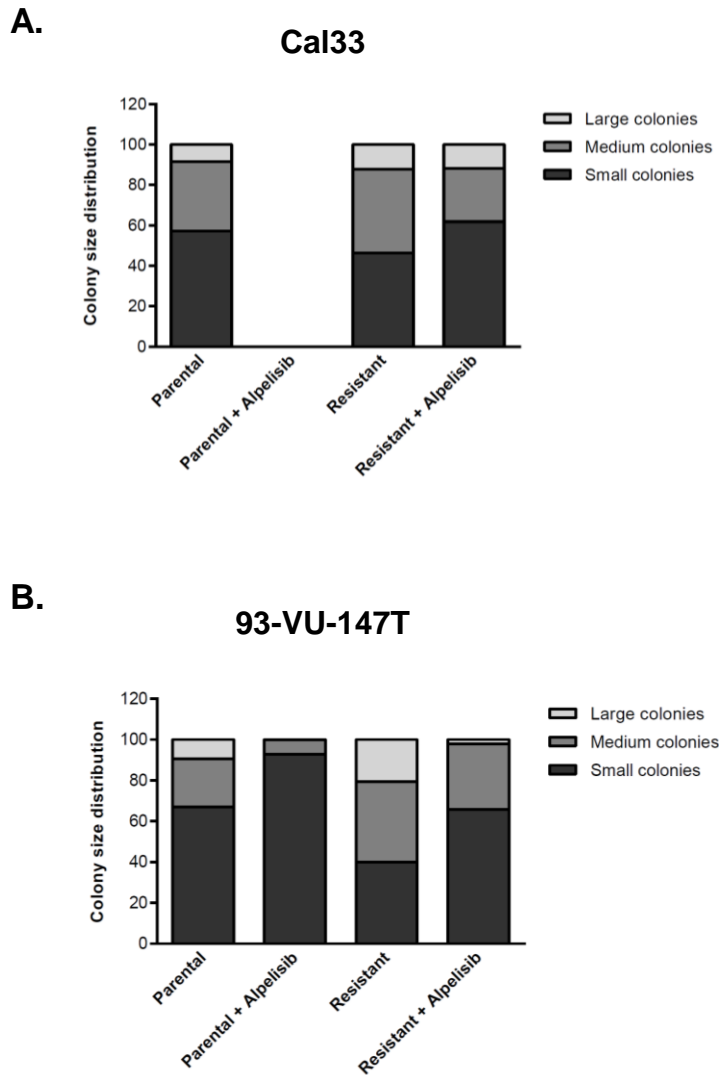

**Additional Fig. 3.** Relative abundance of small, medium and large sized colonies for parental and alpelisib-resistant cell lines ((**A**) Cal33 cells, (**B**) 93-VU-147T cells) when untreated, and when treated with alpelisib. Colony counts and sizes were analyzed in ImageJ version 1.52a. Briefly, RGB images of wells were converted in binary images and analyzed using the Analyze Particles feature. Colony size cutoffs were set as follows (in pixels): Small 0-100; Medium 101-500; Large  $\geq 501$ .

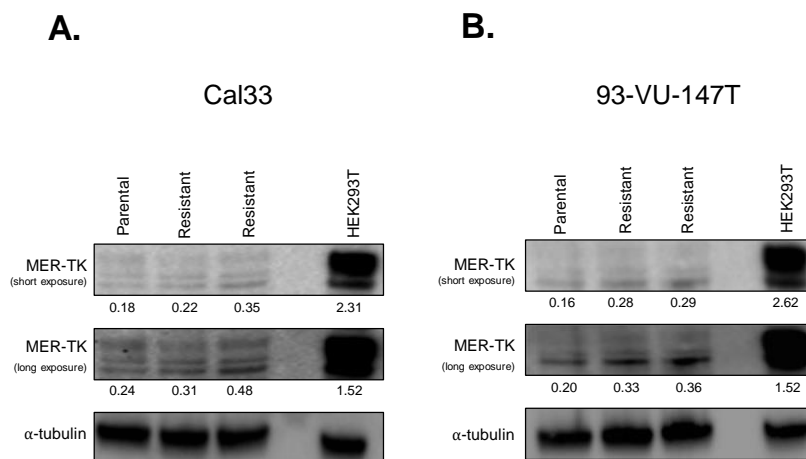

**Additional Fig. 4. (A) & (B)** Immunoblot of MER-TK expression in parental and alpelisib-resistant Cal33 and 93-VU-147T cells. Short and long exposures of MER-TK blot are shown. HEK293T cells served as a positive control for MER-TK expression.



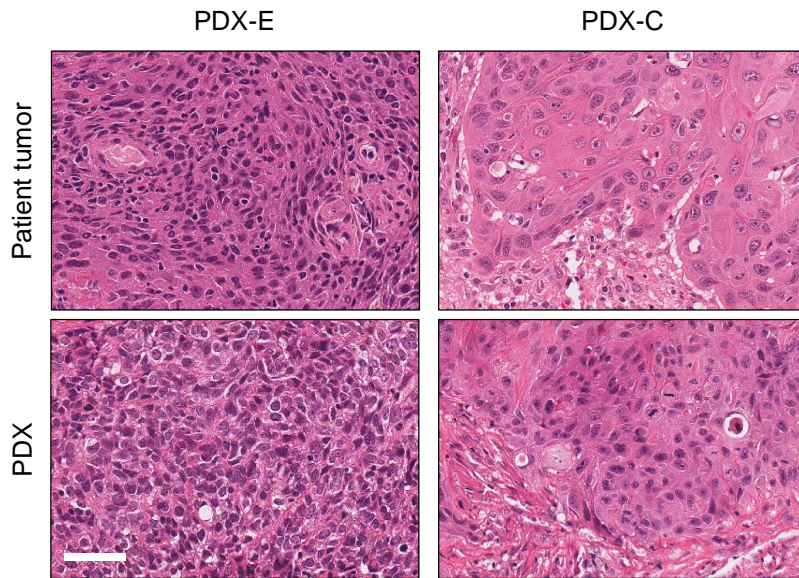

**Additional Fig. 5.** Histological comparison of PDX tissues and their corresponding primary tumors (where available), stained with H&E. Scale bar represents 50μM.

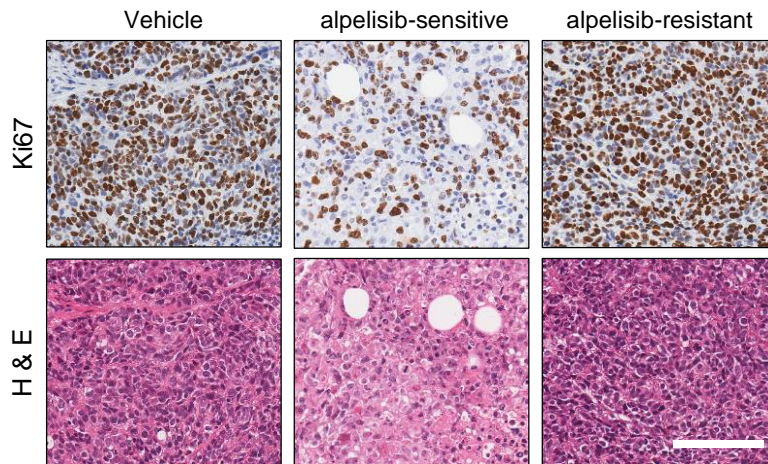

**Additional Fig. 6.** Representative IHC sections showing Ki67 staining PDX tissues treated with the vehicle agent (corn oil) or apellisib (endpoint either while still responding or treated out to the emergence of resistance). Scale bar represents 100 $\mu$ M.

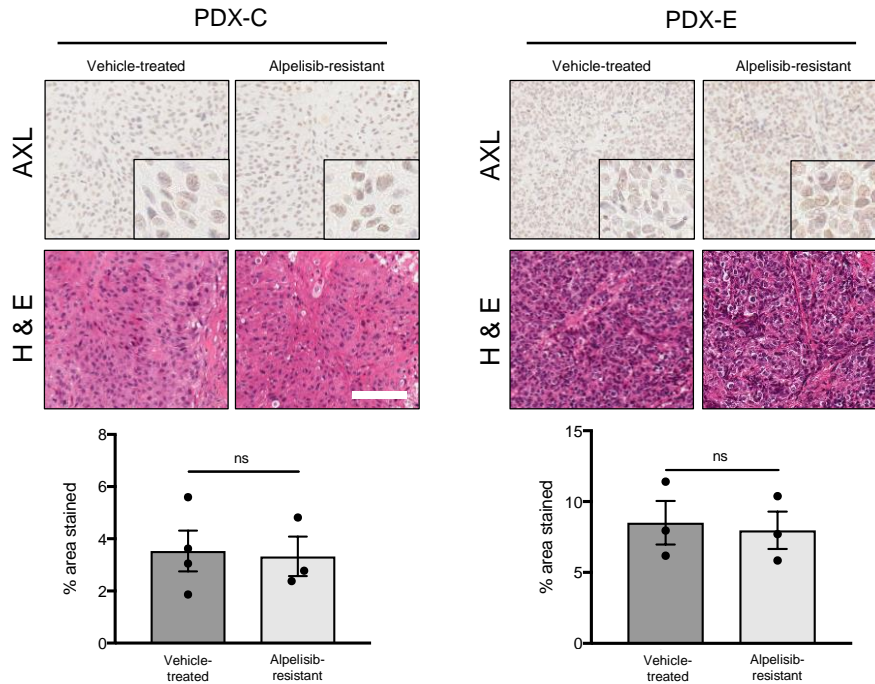

**Additional Fig. 7.** Representative IHC sections showing AXL staining in PDX-C and PDX-E models. Quantification completed using Fiji software is shown below. ns = not significant, unpaired Student's *t*-test. Scale bars represent 100 $\mu$ M.

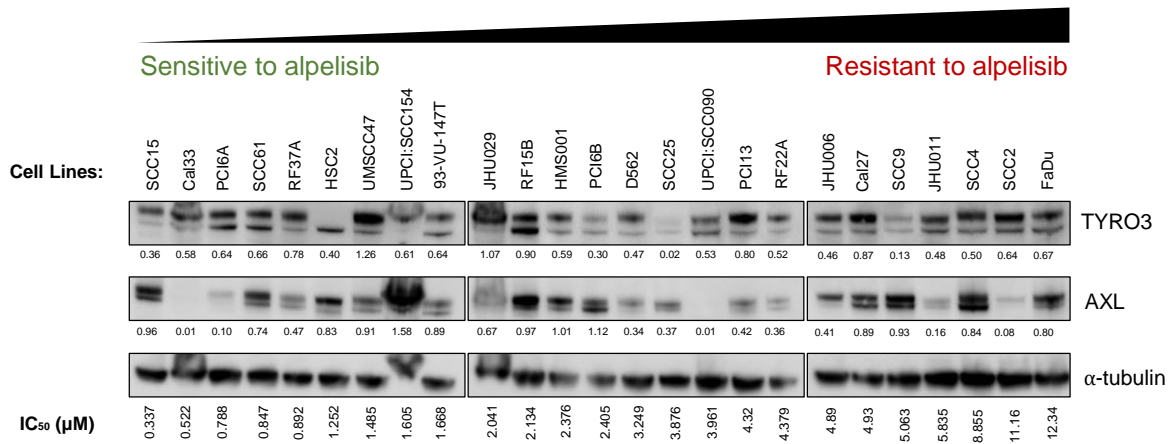

**Additional Fig. 8.** Immunoblot of TYRO3 and AXL expression in 25 HNSCC cell lines, ordered by sensitivity to alpelisib (IC<sub>50</sub> values indicated).
